# Supplementary material for: Synergistic acceleration of machine learning and molecular docking for prostate-specific antigen ligand design
Source: Royal Society of Chemistry journal article supplement (doi:10.1039/d3ra08550c), 2024-01-01
Supplement: d3ra08550c1.pdf [file d3ra08550c1.pdf]

# **Synergistic acceleration of prostate-specific antigen ligand design and synthesis via machine learning and molecular docking.**

**Shao-Long Lin <sup>a,b</sup>, Yan-Song Chen <sup>c</sup>, Ruo-Yu Liu <sup>a,b</sup>, Mei-Ying Zhu <sup>d</sup>, Tian Zhu <sup>d</sup>, Ming-Qi Wang <sup>c,\*</sup> and Bao-Quan Liu <sup>a,b,\*</sup>**

<sup>a</sup> Department of Bioengineering, College of Life Science, Dalian Minzu University, Dalian 116600, China

<sup>b</sup> Key Laboratory of Biotechnology and Bioresources Utilization of Ministry of Education, College of Life Science, Dalian Minzu University, Dalian 116600, China

<sup>c</sup> School of Pharmacy, Jiangsu University, Zhenjiang, 212013, PR China

<sup>d</sup> BEIJING BIONAXIN BIOTECH CO, Beijing, 1000000, China

\* Correspondence: wmq3415@163.com(M.W.); lbq@dlmu.edu.cn(B.L.)

## Table of Content

|                                                                                                                                 |   |
|---------------------------------------------------------------------------------------------------------------------------------|---|
| 1. Maximum common substructures selected by K-means clustering .....                                                            | 3 |
| 2. Synthetic routes of the synthesized ligands.....                                                                             | 3 |
| 3. Nuclear magnetic resonance (NMR) spectra of the synthesized ligands. ....                                                    | 3 |
| 4. Circular dichroism (CD) experiments illustrating the impact of compound addition on protein structure through titration..... | 4 |
| 5. The 2D structures of the published compounds .....                                                                           | 4 |
| 6. Free energy landscape diagrams for the synthesized molecules.....                                                            | 5 |
| 7. The results of the virtual screening of the ZINC database.....                                                               | 6 |

## 1. Maximum common substructures selected by K-means clustering.

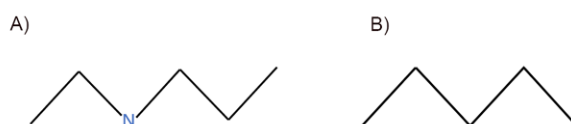

Fig. S1 Maximum common substructures selected by K-means clustering.

## 2. Synthetic routes of the synthesized ligands.

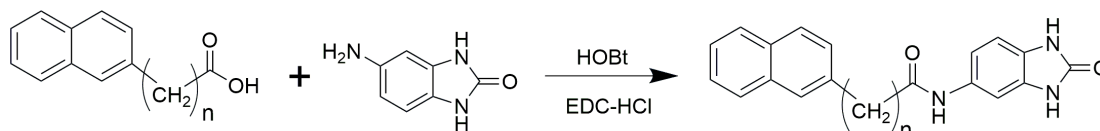

Fig. S2 Synthetic route of compounds, where  $n=1$  for the synthesis of ligand 1, and  $n=2$  for the synthesis of ligand 2.

## 3. Nuclear magnetic resonance (NMR) spectra of the synthesized ligands.

Synthesis of ligand 1: 2-(Naphthalen-2-yl)acetic acid (0.50 g, 2.68 mmol) was dissolved in DMF (30.0 mL). EDC-HCl (0.51 g, 2.68 mmol) and HOBT (0.36 g, 38.0 mmol) were added, and the mixture was stirred for 1 h. 5-amino-2-benzimidazolinone (0.40 g, 2.68 mmol) and triethylamine (0.45g, 4.50 mmol) were added, and the mixture was stirred at room temperature for 12 hour. The resulting suspension was separated by filtration and washed several times with water to give the compound (0.62g, 72.9%) as a white solid.  $^1\text{H NMR}$  (400 MHz, DMSO- $d_6$ )  $\delta$  10.55 (s, 1H), 10.49 (s, 1H), 10.11 (s, 1H), 7.88-7.82 (m, 4H), 7.51-7.48 (m, 4H), 7.05 (d, 1H,  $J = 8.04$  Hz), 6.84 (d, 1H,  $J = 8.24$  Hz), 3.78 (s, 2H).

Synthesis of ligand 2: To a solution of 5-amino-2-benzimidazolinone (0.55 g, 3.69 mmol) and 3-(naphthalen-2-yl)propanoic acid (0.74 g, 3.69 mmol) in DMF (30.0 mL) at  $0^\circ\text{C}$  was added HOBT (0.59 g, 4.43 mmol), EDC-HCl (0.87 g, 4.43 mmol) and triethylamine (0.45g, 4.50 mmol). The mixture was kept at room temperature and magnetically stirred for 12 h. Then the solution was diluted with water. The resulting suspension was separated by filtration and washed several times with water to give the compound (0.85g, 66.4%) as a white solid.  $^1\text{H NMR}$  (400 MHz, DMSO- $d_6$ )  $\delta$  10.52 (s, 1H), 10.45 (s, 1H), 9.78 (s, 1H), 7.85-7.80 (m, 3H), 7.73 (s, 1H), 7.47-7.41 (m, 4H), 6.97 (dd, 1H,  $J_1 = 1.68$  Hz,  $J_2 = 8.36$  Hz), 6.80 (d, 1H,  $J = 8.32$  Hz), 3.08 (t, 2H,  $J = 7.4$  Hz), 2.69 (t, 2H,  $J = 7.88$  Hz).

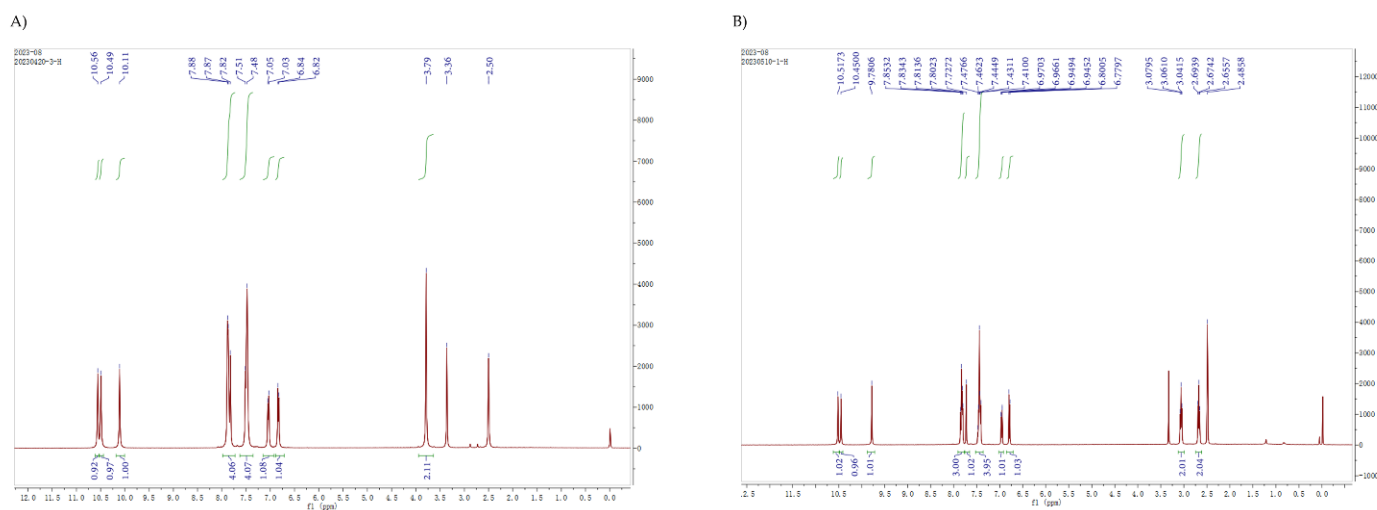

Fig. S3 Nuclear magnetic resonance (NMR) spectra of the synthesized ligands. (A) NMR spectrum of Ligand 1. (B) NMR spectrum of Ligand 2

#### 4. Circular dichroism (CD) experiments illustrating the impact of compound addition on protein structure through titration.

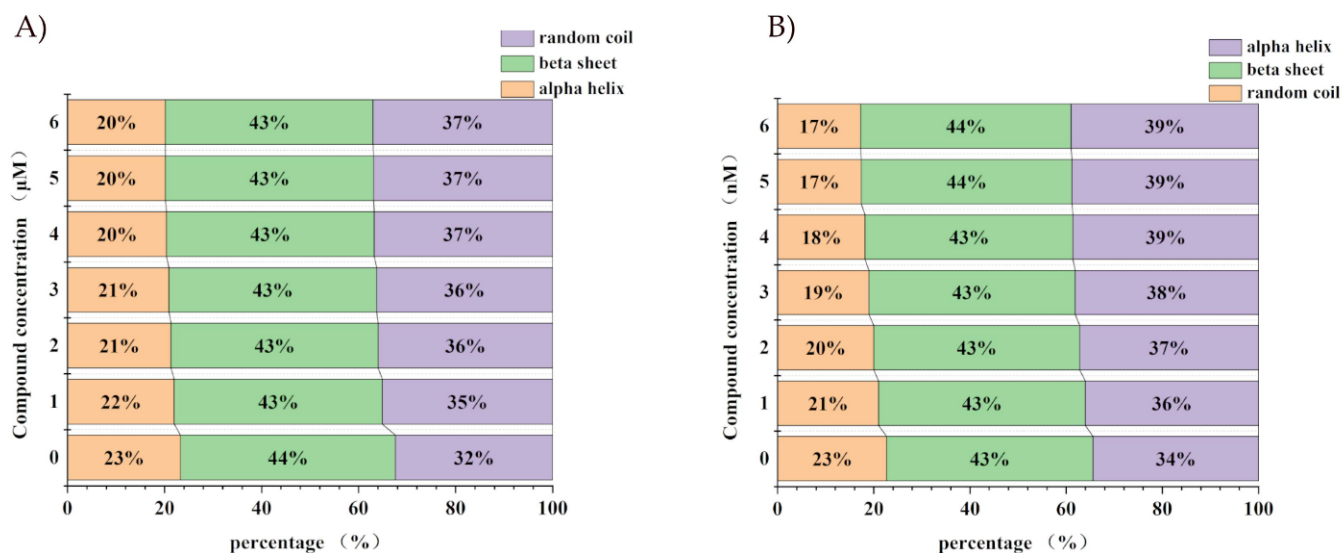

Fig. S4 Circular dichroism (CD) experiments illustrating the impact of compound addition on protein structure through titration. The x-axis denotes the protein structure content, while the y-axis represents the compound concentration. At a 6 nM compound concentration, the PSA protein:compound ratio is 1:3. (A) Titration results for ligand 1. (B) Titration results for ligand 2

#### 5. The 2D structures of the published compounds

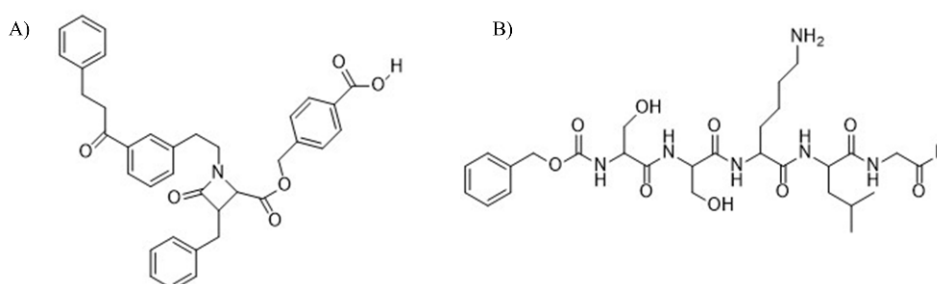

Fig. S5 The 2D structures of published compounds, where A) represents the 2D structure of Drug 1, and B) represents the 2D structure of Drug 2

## 6. Free energy landscape diagrams for the synthesized molecules.

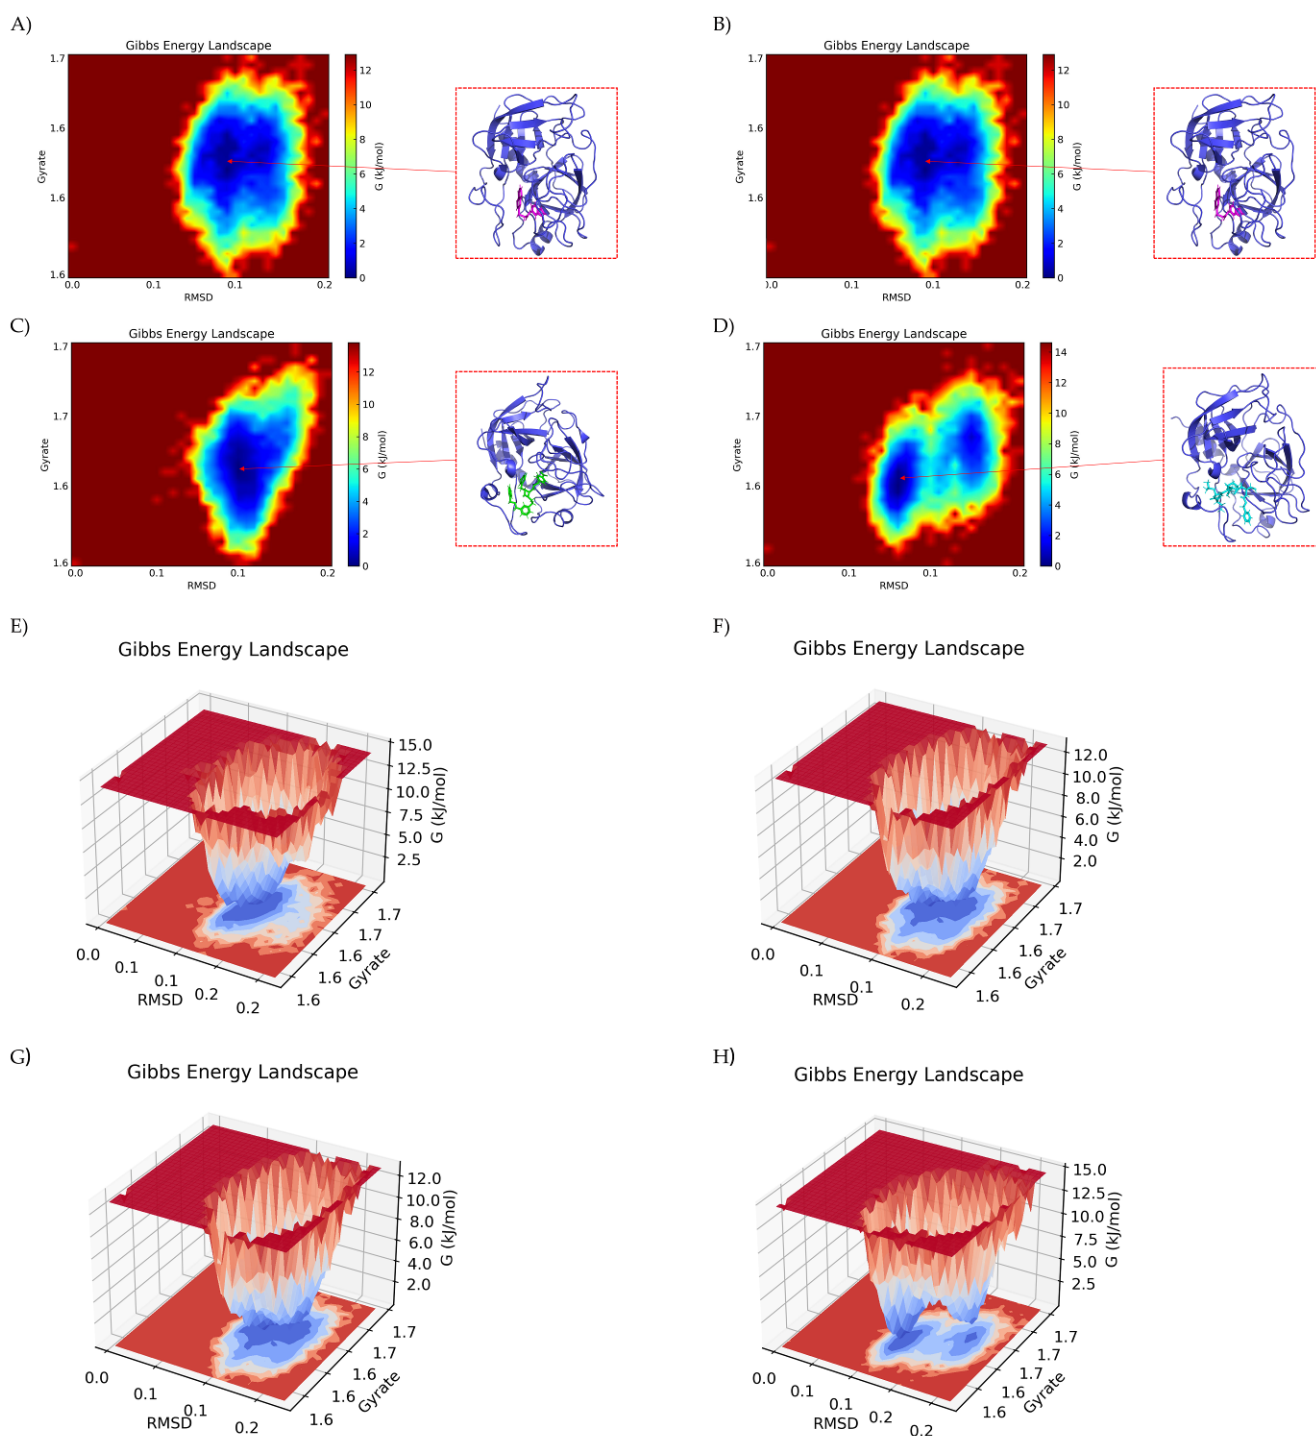

**Fig. S6** Free energy landscape diagrams for the synthesized molecules. (A-D) 2D free energy landscapes of Ligand 1, Ligand 2, Drug1, and Drug2, respectively. (E-H) 3D free energy landscapes of Ligand 1, Ligand 2, Drug1, and Drug2, respectively.

## 7. The results of the virtual screening of the ZINC database

**Table S1.** ZINC IDs and Docking Scores for Compounds Selected by Energy-Based Molecular Docking Ranking

| zinc ID          | docking score |
|------------------|---------------|
| ZINC001303024265 | -12.2         |
| ZINC001302886155 | -12.2         |
| ZINC001302621185 | -12.1         |
| ZINC001301857985 | -12.1         |
| ZINC001300859443 | -12           |
| ZINC001299088766 | -11.9         |
| ZINC001298842200 | -11.9         |
| ZINC001298393624 | -11.8         |
| ZINC001295921675 | -11.8         |
| ZINC001295921670 | -11.8         |
| ZINC001292445726 | -11.8         |
| ZINC001291626372 | -11.8         |
| ZINC001264903536 | -11.7         |
| ZINC001264377885 | -11.7         |
| ZINC001165022273 | -11.7         |
| ZINC001165021712 | -11.6         |
| ZINC001165015850 | -11.6         |
| ZINC001165008046 | -11.6         |
| ZINC001165007979 | -11.5         |
| ZINC001165007842 | -11.5         |
| ZINC001165007370 | -11.5         |
| ZINC001165006912 | -11.5         |
| ZINC001165006452 | -11.5         |
| ZINC001165006094 | -11.5         |
| ZINC001165006006 | -11.5         |
| ZINC001165005767 | -11.5         |
| ZINC001165005725 | -11.4         |
| ZINC001165005694 | -11.4         |
| ZINC001165005378 | -11.4         |
| ZINC001165005355 | -11.4         |
| ZINC001165005314 | -11.4         |
| ZINC001165003966 | -11.4         |
| ZINC001165003927 | -11.4         |
| ZINC001165003918 | -11.4         |
| ZINC001165003912 | -11.4         |
| ZINC001165003739 | -11.3         |
| ZINC001165003656 | -11.3         |
| ZINC001165003182 | -11.3         |
| ZINC001164999320 | -11.3         |
| ZINC001164997180 | -11.3         |
| ZINC001164991041 | -11.3         |
| ZINC001164990778 | -11.3         |

|                  |       |
|------------------|-------|
| ZINC001164990475 | -11.3 |
| ZINC001164989482 | -11.3 |
| ZINC001164988826 | -11.3 |
| ZINC001164979744 | -11.2 |
| ZINC001164978834 | -11.2 |
| ZINC001164978535 | -11.2 |
| ZINC001164978511 | -11.2 |
| ZINC001164975603 | -11.2 |
| ZINC001164971047 | -11.2 |
| ZINC001164970921 | -11.2 |
| ZINC001164969478 | -11.2 |
| ZINC001164969124 | -11.2 |
| ZINC001164960159 | -11.2 |
| ZINC001164955915 | -11.2 |
| ZINC001164954569 | -11.2 |
| ZINC001164953578 | -11.2 |
| ZINC001164951630 | -11.2 |
| ZINC001164949288 | -11.2 |
| ZINC001164948976 | -11.2 |
| ZINC001164948267 | -11.2 |
| ZINC001164945127 | -11.2 |
| ZINC001164945049 | -11.2 |
| ZINC001164942530 | -11.2 |
| ZINC001164934973 | -11.2 |
| ZINC001164930063 | -11.2 |
| ZINC001164930061 | -11.2 |
| ZINC001164930060 | -11.2 |
| ZINC001164928805 | -11.2 |
| ZINC001164928800 | -11.2 |
| ZINC001164909878 | -11.2 |
| ZINC001164905763 | -11.2 |
| ZINC001164902615 | -11.2 |
| ZINC001164880262 | -11.2 |
| ZINC001164877267 | -11.2 |
| ZINC001164876769 | -11.1 |
| ZINC001164873978 | -11.1 |
| ZINC001164873702 | -11.1 |
| ZINC001164868503 | -11.1 |
| ZINC001164864000 | -11.1 |
| ZINC001164862057 | -11.1 |
| ZINC001164861292 | -11.1 |
| ZINC001164855942 | -11.1 |
| ZINC001164792703 | -11.1 |
| ZINC001164789079 | -11.1 |
| ZINC001164780112 | -11.1 |
| ZINC001164779900 | -11.1 |
| ZINC001164779157 | -11.1 |

|                  |       |
|------------------|-------|
| ZINC001164777103 | -11.1 |
| ZINC001164775987 | -11.1 |
| ZINC001164720241 | -11.1 |
| ZINC001164718448 | -11.1 |
| ZINC001164712672 | -11.1 |
| ZINC001164707758 | -11.1 |
| ZINC001164706253 | -11.1 |
| ZINC001164705872 | -11.1 |
| ZINC001164705865 | -11.1 |
| ZINC001164687387 | -11.1 |
| ZINC001164685384 | -11.1 |
| ZINC001164673157 | -11.1 |
| ZINC001164665368 | -11.1 |
| ZINC001164664901 | -11.1 |
| ZINC001164664620 | -11.1 |
| ZINC001164664505 | -11.1 |
| ZINC001164663933 | -11.1 |
| ZINC001164663884 | -11.1 |
| ZINC001164663413 | -11.1 |
| ZINC001164663322 | -11.1 |
| ZINC001164663110 | -11.1 |
| ZINC001164655440 | -11.1 |
| ZINC001164655275 | -11.1 |
| ZINC001164651689 | -11.1 |
| ZINC001164649323 | -11.1 |
| ZINC001164621205 | -11.1 |
| ZINC001164401710 | -11.1 |
| ZINC000685944023 | -11.1 |
| ZINC000604419676 | -11.1 |
| ZINC000604419552 | -11.1 |
| ZINC000604419194 | -11.1 |
| ZINC000604419193 | -11   |
| ZINC000604404932 | -11   |
| ZINC000604403921 | -11   |
| ZINC000588227740 | -11   |
| ZINC000588227719 | -11   |
| ZINC000585262007 | -11   |
| ZINC000585261933 | -11   |
| ZINC000585261906 | -11   |
| ZINC000585261223 | -11   |
| ZINC000585106363 | -11   |
| ZINC000524735119 | -11   |
| ZINC000524733913 | -11   |
| ZINC000409394377 | -11   |
| ZINC000409358844 | -11   |
| ZINC000409249671 | -11   |
| ZINC000409232194 | -11   |



|                  |       |
|------------------|-------|
| ZINC000409222630 | -11   |
| ZINC000408757990 | -11   |
| ZINC000408649973 | -11   |
| ZINC000408557186 | -11   |
| ZINC000408537022 | -11   |
| ZINC000408526277 | -11   |
| ZINC000390831201 | -11   |
| ZINC000306134003 | -11   |
| ZINC000306123184 | -11   |
| ZINC000299780894 | -11   |
| ZINC000260907932 | -11   |
| ZINC000260905749 | -11   |
| ZINC000260905743 | -11   |
| ZINC000260826428 | -11   |
| ZINC000257357008 | -11   |
| ZINC000257344237 | -11   |
| ZINC000257336983 | -11   |
| ZINC000257336586 | -11   |
| ZINC000257336537 | -11   |
| ZINC000257333127 | -11   |
| ZINC000257332903 | -11   |
| ZINC000257327782 | -11   |
| ZINC000257326385 | -11   |
| ZINC000257324342 | -11   |
| ZINC000257318635 | -11   |
| ZINC000257318634 | -11   |
| ZINC000257317468 | -11   |
| ZINC000257315188 | -11   |
| ZINC000257314146 | -11   |
| ZINC000257309525 | -11   |
| ZINC000257304106 | -11   |
| ZINC000257302570 | -11   |
| ZINC000257297002 | -11   |
| ZINC000257296253 | -11   |
| ZINC000257295586 | -11   |
| ZINC000257291264 | -11   |
| ZINC000257282411 | -11   |
| ZINC000257280848 | -11   |
| ZINC000257280030 | -11   |
| ZINC000257278585 | -10.9 |
| ZINC000257278584 | -10.9 |
| ZINC000257267373 | -10.9 |
| ZINC000257259419 | -10.9 |
| ZINC000257255729 | -10.9 |
| ZINC000257254588 | -10.9 |
| ZINC000257249493 | -10.9 |
| ZINC000257249362 | -10.9 |

|                  |       |
|------------------|-------|
| ZINC000257248205 | -10.9 |
| ZINC000257245377 | -10.9 |
| ZINC000257239353 | -10.9 |
| ZINC000257236435 | -10.9 |
| ZINC000257230684 | -10.9 |
| ZINC000257226068 | -10.9 |
| ZINC000257225159 | -10.9 |
| ZINC000257220273 | -10.9 |
| ZINC000257218423 | -10.9 |
| ZINC000257218376 | -10.9 |
| ZINC000257217728 | -10.9 |
| ZINC000257214435 | -10.9 |
| ZINC000257210192 | -10.9 |
| ZINC000257209555 | -10.9 |
| ZINC000257206962 | -10.9 |
| ZINC000257203900 | -10.9 |
| ZINC000257202004 | -10.9 |
| ZINC000257198969 | -10.9 |
| ZINC000257198966 | -10.9 |
| ZINC000257198615 | -10.9 |
| ZINC000257198612 | -10.9 |
| ZINC000257198536 | -10.9 |
| ZINC000253574450 | -10.9 |
| ZINC000253570268 | -10.9 |
| ZINC000253487525 | -10.9 |
| ZINC000253486914 | -10.9 |
| ZINC000253486913 | -10.9 |
| ZINC000253412135 | -10.9 |
| ZINC000253406491 | -10.9 |
| ZINC000253403865 | -10.9 |
| ZINC000253389854 | -10.9 |
| ZINC000253389833 | -10.9 |
| ZINC000253389815 | -10.9 |
| ZINC000253389807 | -10.9 |
| ZINC000252629937 | -10.9 |
| ZINC000252517639 | -10.9 |
| ZINC000252517201 | -10.9 |
| ZINC000252498173 | -10.9 |
| ZINC000252445399 | -10.9 |
| ZINC000252430660 | -10.9 |
| ZINC000248336141 | -10.9 |
| ZINC000248333022 | -10.9 |
| ZINC000248268000 | -10.9 |
| ZINC000248146868 | -10.9 |
| ZINC000248083541 | -10.9 |
| ZINC000248055833 | -10.9 |
| ZINC000248026334 | -10.9 |

|                  |       |
|------------------|-------|
| ZINC000247898138 | -10.9 |
| ZINC000247850321 | -10.9 |
| ZINC000247813445 | -10.9 |
| ZINC000247803817 | -10.9 |
| ZINC000247801399 | -10.9 |
| ZINC000247778289 | -10.9 |
| ZINC000247745472 | -10.9 |
| ZINC000247711421 | -10.9 |
| ZINC000245328674 | -10.9 |
| ZINC000245328579 | -10.9 |
| ZINC000245328190 | -10.9 |
| ZINC000245312810 | -10.9 |
| ZINC000245311646 | -10.9 |
| ZINC000245257380 | -10.9 |
| ZINC000245247238 | -10.9 |
| ZINC000245247237 | -10.9 |
| ZINC000245247236 | -10.9 |
| ZINC000245246816 | -10.9 |
| ZINC000245246814 | -10.9 |
| ZINC000239309391 | -10.8 |
| ZINC000238950675 | -10.8 |
| ZINC000230038145 | -10.8 |
| ZINC000230029270 | -10.8 |
| ZINC000230026825 | -10.8 |
| ZINC000230001654 | -10.8 |
| ZINC000229985461 | -10.8 |
| ZINC000229977122 | -10.8 |
| ZINC000229902149 | -10.8 |
| ZINC000229899931 | -10.8 |
| ZINC000229895971 | -10.8 |
| ZINC000229894546 | -10.8 |
| ZINC000229894290 | -10.8 |
| ZINC000229634738 | -10.8 |
| ZINC000229435453 | -10.8 |
| ZINC000226932160 | -10.8 |
| ZINC000226498061 | -10.8 |
| ZINC000225763088 | -10.8 |
| ZINC000225747362 | -10.8 |
| ZINC000225745732 | -10.8 |
| ZINC000225744397 | -10.8 |
| ZINC000225268457 | -10.8 |
| ZINC000221965327 | -10.8 |
| ZINC000217818497 | -10.8 |
| ZINC000217788263 | -10.8 |
| ZINC000216137252 | -10.8 |
| ZINC000216137203 | -10.8 |
| ZINC000214081495 | -10.8 |

|                  |       |
|------------------|-------|
| ZINC000209335732 | -10.8 |
| ZINC000208133270 | -10.8 |
| ZINC000206645490 | -10.8 |
| ZINC000198640891 | -10.8 |
| ZINC000198414845 | -10.8 |
| ZINC000169780411 | -10.8 |
| ZINC000169770368 | -10.8 |
| ZINC000169770268 | -10.8 |
| ZINC000169768878 | -10.8 |
| ZINC000169704342 | -10.8 |
| ZINC000169687999 | -10.8 |
| ZINC000169621136 | -10.8 |
| ZINC000169617470 | -10.8 |
| ZINC000169309170 | -10.8 |
| ZINC000141520730 | -10.8 |
| ZINC000138685242 | -10.8 |
| ZINC000138685109 | -10.8 |
| ZINC000138084974 | -10.8 |
| ZINC000137939475 | -10.8 |
| ZINC000137913075 | -10.8 |
| ZINC000137772247 | -10.8 |
| ZINC000108522899 | -10.8 |
| ZINC000106736619 | -10.8 |
| ZINC000106535935 | -10.8 |
| ZINC000106535908 | -10.8 |
| ZINC000106535737 | -10.8 |
| ZINC000106535652 | -10.8 |
| ZINC000106535190 | -10.8 |
| ZINC000106336438 | -10.8 |
| ZINC000106304183 | -10.8 |
| ZINC000106304081 | -10.8 |
| ZINC000104085244 | -10.8 |
| ZINC000103929296 | -10.8 |
| ZINC000103639054 | -10.8 |
| ZINC000103151620 | -10.8 |
| ZINC000103085856 | -10.8 |
| ZINC000103085851 | -10.8 |
| ZINC000103059409 | -10.8 |
| ZINC000102819589 | -10.8 |
| ZINC000102797178 | -10.8 |
| ZINC000102772180 | -10.8 |
| ZINC000101995578 | -10.8 |
| ZINC000101859229 | -10.8 |
| ZINC000101500431 | -10.8 |
| ZINC000101488839 | -10.8 |
| ZINC000101484849 | -10.8 |
| ZINC000101414035 | -10.8 |

|                  |       |
|------------------|-------|
| ZINC000101408575 | -10.8 |
| ZINC000101344473 | -10.8 |
| ZINC000101344419 | -10.8 |
| ZINC000101344279 | -10.8 |
| ZINC000101341840 | -10.8 |
| ZINC000101257089 | -10.8 |
| ZINC000101213485 | -10.8 |
| ZINC000101169718 | -10.8 |
| ZINC000101130346 | -10.8 |
| ZINC000101106402 | -10.8 |
| ZINC000101104264 | -10.8 |
| ZINC000101099845 | -10.8 |
| ZINC000100910782 | -10.8 |
| ZINC000100910780 | -10.8 |
| ZINC000100909545 | -10.8 |
| ZINC000100877263 | -10.8 |
| ZINC000100621349 | -10.8 |
| ZINC000100613844 | -10.8 |
| ZINC000100542133 | -10.8 |
| ZINC000100210181 | -10.8 |
| ZINC000096997615 | -10.8 |
| ZINC000096833036 | -10.8 |
| ZINC000096402882 | -10.8 |
| ZINC000096345459 | -10.8 |
| ZINC000096319663 | -10.8 |
| ZINC000096318585 | -10.8 |
| ZINC000096298537 | -10.8 |
| ZINC000096237952 | -10.8 |
| ZINC000096156954 | -10.8 |
| ZINC000096025910 | -10.8 |
| ZINC000096025627 | -10.8 |
| ZINC000095613837 | -10.8 |
| ZINC000095478470 | -10.8 |
| ZINC000095478469 | -10.8 |
| ZINC000095478336 | -10.8 |
| ZINC000095478140 | -10.8 |
| ZINC000095478139 | -10.8 |
| ZINC000095477515 | -10.8 |
| ZINC000095476701 | -10.8 |
| ZINC000095475836 | -10.8 |
| ZINC000095475612 | -10.8 |
| ZINC000095475611 | -10.8 |
| ZINC000095474784 | -10.8 |
| ZINC000095474735 | -10.8 |
| ZINC000095474203 | -10.8 |
| ZINC000095474118 | -10.8 |
| ZINC000095474117 | -10.8 |

|                  |       |
|------------------|-------|
| ZINC000095474116 | -10.8 |
| ZINC000095474115 | -10.8 |
| ZINC000095473507 | -10.8 |
| ZINC000095473504 | -10.7 |
| ZINC000095472505 | -10.7 |
| ZINC000095472103 | -10.7 |
| ZINC000095472102 | -10.7 |
| ZINC000095445250 | -10.7 |
| ZINC000095445249 | -10.7 |
| ZINC000095402007 | -10.7 |
| ZINC000089857670 | -10.7 |
| ZINC000085875547 | -10.7 |
| ZINC000085393332 | -10.7 |
| ZINC000085392618 | -10.7 |
| ZINC000077263739 | -10.7 |
| ZINC000077200474 | -10.7 |
| ZINC000072405138 | -10.7 |
| ZINC000072405137 | -10.7 |
| ZINC000072404979 | -10.7 |
| ZINC000072404978 | -10.7 |
| ZINC000072404829 | -10.7 |
| ZINC000072403238 | -10.7 |
| ZINC000072403237 | -10.7 |
| ZINC000072396437 | -10.7 |
| ZINC000072389405 | -10.7 |
| ZINC000072380212 | -10.7 |
| ZINC000072375170 | -10.7 |
| ZINC000072370552 | -10.7 |
| ZINC000072370551 | -10.7 |
| ZINC000072356165 | -10.7 |
| ZINC000072349740 | -10.7 |
| ZINC000072329734 | -10.7 |
| ZINC000072329733 | -10.7 |
| ZINC000072329717 | -10.7 |
| ZINC000072308952 | -10.7 |
| ZINC000072301103 | -10.7 |
| ZINC000071922028 | -10.7 |
| ZINC000071328417 | -10.7 |
| ZINC000067318787 | -10.7 |
| ZINC000065521972 | -10.7 |
| ZINC000065199077 | -10.7 |
| ZINC000065199069 | -10.7 |
| ZINC000065199067 | -10.7 |
| ZINC000065199065 | -10.7 |
| ZINC000065199051 | -10.7 |
| ZINC000065183337 | -10.7 |
| ZINC000065096404 | -10.7 |

|                  |       |
|------------------|-------|
| ZINC000065011057 | -10.7 |
| ZINC000064998737 | -10.7 |
| ZINC000064987714 | -10.7 |
| ZINC000064986016 | -10.7 |
| ZINC000064986012 | -10.7 |
| ZINC000064985390 | -10.7 |
| ZINC000064966977 | -10.7 |
| ZINC000064787552 | -10.7 |
| ZINC000064580790 | -10.7 |
| ZINC000064566691 | -10.7 |
| ZINC000064566665 | -10.7 |
| ZINC000064566652 | -10.7 |
| ZINC000064566569 | -10.7 |
| ZINC000062606727 | -10.7 |
| ZINC000062595240 | -10.7 |
| ZINC000061997761 | -10.7 |
| ZINC000061935813 | -10.7 |
| ZINC000058419378 | -10.7 |
| ZINC000057487043 | -10.7 |
| ZINC000057122076 | -10.7 |
| ZINC000057105531 | -10.7 |
| ZINC000051353926 | -10.7 |
| ZINC000049947107 | -10.7 |
| ZINC000049604883 | -10.7 |
| ZINC000049408427 | -10.7 |
| ZINC000049408408 | -10.7 |
| ZINC000049408405 | -10.7 |
| ZINC000049408399 | -10.7 |
| ZINC000049408396 | -10.7 |
| ZINC000049408377 | -10.7 |
| ZINC000049402775 | -10.7 |
| ZINC000049402718 | -10.7 |
| ZINC000049402690 | -10.7 |
| ZINC000049171887 | -10.7 |
| ZINC000046081266 | -10.7 |
| ZINC000046027462 | -10.7 |
| ZINC000046027436 | -10.7 |
| ZINC000046005253 | -10.7 |
| ZINC000045899430 | -10.7 |
| ZINC000044947296 | -10.7 |
| ZINC000044903168 | -10.7 |
| ZINC000043741292 | -10.7 |
| ZINC000043732703 | -10.7 |
| ZINC000042382475 | -10.7 |
| ZINC000042380100 | -10.7 |
| ZINC000041089675 | -10.7 |
| ZINC000040400182 | -10.7 |

|                  |       |
|------------------|-------|
| ZINC000040399629 | -10.7 |
| ZINC000040390754 | -10.7 |
| ZINC000040390738 | -10.7 |
| ZINC000040390730 | -10.7 |
| ZINC000040390717 | -10.7 |
| ZINC000040390713 | -10.7 |
| ZINC000040390705 | -10.7 |
| ZINC000040390697 | -10.7 |
| ZINC000040390683 | -10.7 |
| ZINC000040390661 | -10.7 |
| ZINC000040267191 | -10.7 |
| ZINC000040157180 | -10.7 |
| ZINC000040150928 | -10.7 |
| ZINC000040143791 | -10.7 |
| ZINC000040128734 | -10.7 |
| ZINC000040080441 | -10.7 |
| ZINC000040069737 | -10.7 |
| ZINC000039992494 | -10.7 |
| ZINC000039949936 | -10.7 |
| ZINC000038654873 | -10.7 |
| ZINC000038486465 | -10.7 |
| ZINC000038306663 | -10.7 |
| ZINC000038278538 | -10.7 |
| ZINC000038207110 | -10.7 |
| ZINC000038198414 | -10.7 |
| ZINC000037612180 | -10.7 |
| ZINC000036811267 | -10.7 |
| ZINC000036396025 | -10.7 |
| ZINC000036395517 | -10.7 |
| ZINC000036087072 | -10.7 |
| ZINC000036087069 | -10.7 |
| ZINC000036087053 | -10.7 |
| ZINC000036056355 | -10.7 |
| ZINC000036041216 | -10.7 |
| ZINC000035877377 | -10.7 |
| ZINC000035871895 | -10.7 |
| ZINC000035851715 | -10.7 |
| ZINC000035844122 | -10.7 |
| ZINC000035843322 | -10.7 |
| ZINC000035843286 | -10.7 |
| ZINC000035843230 | -10.7 |
| ZINC000035804987 | -10.7 |
| ZINC000035482401 | -10.7 |
| ZINC000035476257 | -10.7 |
| ZINC000035459361 | -10.7 |
| ZINC000035459359 | -10.7 |
| ZINC000035459333 | -10.7 |



|                  |       |
|------------------|-------|
| ZINC000035456319 | -10.7 |
| ZINC000035456314 | -10.7 |
| ZINC000035425477 | -10.7 |
| ZINC000035379157 | -10.7 |
| ZINC000035378873 | -10.7 |
| ZINC000035378812 | -10.7 |
| ZINC000035375706 | -10.7 |
| ZINC000035375698 | -10.7 |
| ZINC000035375696 | -10.7 |
| ZINC000035375610 | -10.7 |
| ZINC000035375607 | -10.7 |
| ZINC000035365999 | -10.7 |
| ZINC000035365997 | -10.7 |
| ZINC000035365995 | -10.7 |
| ZINC000035361861 | -10.7 |
| ZINC000035315081 | -10.7 |
| ZINC000034812146 | -10.7 |
| ZINC000034716944 | -10.7 |
| ZINC000033936729 | -10.7 |
| ZINC000033936721 | -10.7 |
| ZINC000033746442 | -10.7 |
| ZINC000033711923 | -10.7 |
| ZINC000033656545 | -10.7 |
| ZINC000033333436 | -10.7 |
| ZINC000033324788 | -10.7 |
| ZINC000033292225 | -10.7 |
| ZINC000033280923 | -10.6 |
| ZINC000033276524 | -10.6 |
| ZINC000033271420 | -10.6 |
| ZINC000033271394 | -10.6 |
| ZINC000033271349 | -10.6 |
| ZINC000033271346 | -10.6 |
| ZINC000033265670 | -10.6 |
| ZINC000033123026 | -10.6 |
| ZINC000033088145 | -10.6 |
| ZINC000033088141 | -10.6 |
| ZINC000033087955 | -10.6 |
| ZINC000033087936 | -10.6 |
| ZINC000032985065 | -10.6 |
| ZINC000032959069 | -10.6 |
| ZINC000032959068 | -10.6 |
| ZINC000032959042 | -10.6 |
| ZINC000032958741 | -10.6 |
| ZINC000032958647 | -10.6 |
| ZINC000032958584 | -10.6 |
| ZINC000032958556 | -10.6 |
| ZINC000032904922 | -10.6 |

|                  |       |
|------------------|-------|
| ZINC000032904798 | -10.6 |
| ZINC000032904516 | -10.6 |
| ZINC000032815092 | -10.6 |
| ZINC000032808456 | -10.6 |
| ZINC000032808455 | -10.6 |
| ZINC000032760660 | -10.6 |
| ZINC000032754962 | -10.6 |
| ZINC000032738252 | -10.6 |
| ZINC000032100125 | -10.6 |
| ZINC000032074512 | -10.6 |
| ZINC000031904085 | -10.6 |
| ZINC000031505912 | -10.6 |
| ZINC000030865821 | -10.6 |
| ZINC000030865815 | -10.6 |
| ZINC000030865808 | -10.6 |
| ZINC000030016693 | -10.6 |
| ZINC000028735615 | -10.6 |
| ZINC000028714806 | -10.6 |
| ZINC000028690681 | -10.6 |
| ZINC000028333181 | -10.6 |
| ZINC000027538902 | -10.6 |
| ZINC000026817032 | -10.6 |
| ZINC000026771808 | -10.6 |
| ZINC000026113800 | -10.6 |
| ZINC000026113794 | -10.6 |
| ZINC000026113774 | -10.6 |
| ZINC000025514335 | -10.6 |
| ZINC000025171137 | -10.6 |
| ZINC000024608087 | -10.6 |
| ZINC000024326427 | -10.6 |
| ZINC000023983445 | -10.6 |
| ZINC000023908436 | -10.6 |
| ZINC000023800777 | -10.6 |
| ZINC000023702989 | -10.6 |
| ZINC000023461419 | -10.6 |
| ZINC000023126499 | -10.6 |
| ZINC000023079599 | -10.6 |
| ZINC000023053419 | -10.6 |
| ZINC000023043149 | -10.6 |
| ZINC000023039747 | -10.6 |
| ZINC000022855261 | -10.6 |
| ZINC000022759061 | -10.6 |
| ZINC000022700063 | -10.6 |
| ZINC000022699872 | -10.6 |
| ZINC000022624134 | -10.6 |
| ZINC000022620527 | -10.6 |
| ZINC000022618968 | -10.6 |

|                  |       |
|------------------|-------|
| ZINC000022618386 | -10.6 |
| ZINC000022618384 | -10.6 |
| ZINC000022604706 | -10.6 |
| ZINC000022604467 | -10.6 |
| ZINC000022593563 | -10.6 |
| ZINC000022527183 | -10.6 |
| ZINC000022409262 | -10.6 |
| ZINC000022185244 | -10.6 |
| ZINC000022024147 | -10.6 |
| ZINC000021940206 | -10.6 |
| ZINC000021726650 | -10.6 |
| ZINC000021477962 | -10.6 |
| ZINC000021180005 | -10.6 |
| ZINC000021042981 | -10.6 |
| ZINC000020996921 | -10.6 |
| ZINC000020994139 | -10.6 |
| ZINC000020987055 | -10.6 |
| ZINC000020902283 | -10.6 |
| ZINC000020898600 | -10.6 |
| ZINC000020898598 | -10.6 |
| ZINC000020898517 | -10.6 |
| ZINC000020893796 | -10.6 |
| ZINC000020782937 | -10.6 |
| ZINC000020760231 | -10.6 |
| ZINC000020758902 | -10.6 |
| ZINC000020758657 | -10.6 |
| ZINC000020730546 | -10.6 |
| ZINC000020713684 | -10.6 |
| ZINC000020588479 | -10.6 |
| ZINC000020581583 | -10.6 |
| ZINC000020577884 | -10.6 |
| ZINC000020572816 | -10.6 |
| ZINC000020572314 | -10.6 |
| ZINC000020572287 | -10.6 |
| ZINC000020572283 | -10.6 |
| ZINC000020572281 | -10.6 |
| ZINC000020572238 | -10.6 |
| ZINC000020533847 | -10.6 |
| ZINC000020477666 | -10.6 |
| ZINC000020357189 | -10.6 |
| ZINC000020258763 | -10.6 |
| ZINC000020234909 | -10.6 |
| ZINC000020154513 | -10.6 |
| ZINC000020108329 | -10.6 |
| ZINC000020080812 | -10.6 |
| ZINC000020050768 | -10.6 |
| ZINC000019962130 | -10.6 |

|                  |       |
|------------------|-------|
| ZINC000019962029 | -10.6 |
| ZINC000019821488 | -10.6 |
| ZINC000019819237 | -10.6 |
| ZINC000019817687 | -10.6 |
| ZINC000019759404 | -10.6 |
| ZINC000019759402 | -10.6 |
| ZINC000019759371 | -10.6 |
| ZINC000019759369 | -10.6 |
| ZINC000019741286 | -10.6 |
| ZINC000019713150 | -10.6 |
| ZINC000019703470 | -10.6 |
| ZINC000019700235 | -10.6 |
| ZINC000019700222 | -10.6 |
| ZINC000019695683 | -10.6 |
| ZINC000019693934 | -10.6 |
| ZINC000019693922 | -10.6 |
| ZINC000019693920 | -10.6 |
| ZINC000019693212 | -10.6 |
| ZINC000019693145 | -10.6 |
| ZINC000019591554 | -10.6 |
| ZINC000019579207 | -10.6 |
| ZINC000019558796 | -10.6 |
| ZINC000019558794 | -10.6 |
| ZINC000019529008 | -10.6 |
| ZINC000019449380 | -10.6 |
| ZINC000019375452 | -10.6 |
| ZINC000019375051 | -10.6 |
| ZINC000019374228 | -10.6 |
| ZINC000019354135 | -10.6 |
| ZINC000019219497 | -10.6 |
| ZINC000019021315 | -10.6 |
| ZINC000018541967 | -10.6 |
| ZINC000018249424 | -10.6 |
| ZINC000018201127 | -10.6 |
| ZINC000018162200 | -10.6 |
| ZINC000018142341 | -10.6 |
| ZINC000018118468 | -10.6 |
| ZINC000018021374 | -10.6 |
| ZINC000017995898 | -10.6 |
| ZINC000017481215 | -10.6 |
| ZINC000017481213 | -10.6 |
| ZINC000017200529 | -10.6 |
| ZINC000017149925 | -10.6 |
| ZINC000017135561 | -10.6 |
| ZINC000017123479 | -10.6 |
| ZINC000017028642 | -10.6 |
| ZINC000016975338 | -10.6 |

|                  |       |
|------------------|-------|
| ZINC000016917840 | -10.6 |
| ZINC000016889068 | -10.6 |
| ZINC000016677331 | -10.6 |
| ZINC000016491517 | -10.6 |
| ZINC000016430849 | -10.6 |
| ZINC000016430844 | -10.6 |
| ZINC000016400843 | -10.6 |
| ZINC000016042940 | -10.6 |
| ZINC000016039278 | -10.6 |
| ZINC000016034079 | -10.6 |
| ZINC000016033792 | -10.6 |
| ZINC000016033791 | -10.6 |
| ZINC000016033648 | -10.6 |
| ZINC000016026354 | -10.6 |
| ZINC000016022055 | -10.6 |
| ZINC000016020587 | -10.6 |
| ZINC000016020583 | -10.6 |
| ZINC000016012740 | -10.6 |
| ZINC000016012676 | -10.6 |
| ZINC000016012650 | -10.6 |
| ZINC000016012511 | -10.6 |
| ZINC000016012509 | -10.6 |
| ZINC000016012100 | -10.6 |
| ZINC000016011950 | -10.6 |
| ZINC000016011936 | -10.6 |
| ZINC000016011848 | -10.6 |
| ZINC000016011683 | -10.6 |
| ZINC000016010252 | -10.6 |
| ZINC000016010248 | -10.6 |
| ZINC000016010178 | -10.6 |
| ZINC000016010123 | -10.6 |
| ZINC000016010046 | -10.6 |
| ZINC000016010015 | -10.6 |
| ZINC000016009989 | -10.6 |
| ZINC000016009988 | -10.6 |
| ZINC000016009829 | -10.6 |
| ZINC000016009620 | -10.6 |
| ZINC000016001953 | -10.6 |
| ZINC000016001937 | -10.6 |
| ZINC000016001911 | -10.6 |
| ZINC000016001782 | -10.6 |
| ZINC000016001780 | -10.6 |
| ZINC000016001682 | -10.6 |
| ZINC000016001578 | -10.6 |
| ZINC000016001500 | -10.6 |
| ZINC000016001498 | -10.6 |
| ZINC000016001299 | -10.6 |

|                  |       |
|------------------|-------|
| ZINC000016000836 | -10.6 |
| ZINC000016000227 | -10.6 |
| ZINC000016000152 | -10.6 |
| ZINC000015999226 | -10.6 |
| ZINC000015999162 | -10.6 |
| ZINC000015999136 | -10.6 |
| ZINC000015996536 | -10.6 |
| ZINC000015996249 | -10.6 |
| ZINC000015996123 | -10.6 |
| ZINC000015990439 | -10.6 |
| ZINC000015990413 | -10.6 |
| ZINC000015989674 | -10.6 |
| ZINC000015972856 | -10.6 |
| ZINC000015972852 | -10.6 |
| ZINC000015972791 | -10.6 |
| ZINC000015972790 | -10.6 |
| ZINC000015972675 | -10.6 |
| ZINC000015972674 | -10.6 |
| ZINC000015972608 | -10.6 |
| ZINC000015972607 | -10.6 |
| ZINC000015972406 | -10.6 |
| ZINC000015972374 | -10.6 |
| ZINC000015972034 | -10.6 |
| ZINC000015972032 | -10.6 |
| ZINC000015971847 | -10.6 |
| ZINC000015971813 | -10.6 |
| ZINC000015971811 | -10.6 |
| ZINC000015971752 | -10.6 |
| ZINC000015971748 | -10.6 |
| ZINC000015971747 | -10.6 |
| ZINC000015971655 | -10.6 |
| ZINC000015971598 | -10.6 |
| ZINC000015971596 | -10.6 |
| ZINC000015969172 | -10.6 |
| ZINC000015967689 | -10.6 |
| ZINC000015959781 | -10.6 |
| ZINC000015959322 | -10.6 |
| ZINC000015958999 | -10.6 |
| ZINC000015958758 | -10.6 |
| ZINC000015958476 | -10.6 |
| ZINC000015958218 | -10.6 |
| ZINC000015958209 | -10.6 |
| ZINC000015957780 | -10.6 |
| ZINC000015957613 | -10.6 |
| ZINC000015957099 | -10.6 |
| ZINC000015957013 | -10.6 |
| ZINC000015956811 | -10.6 |

|                  |       |
|------------------|-------|
| ZINC000015956716 | -10.6 |
| ZINC000015956645 | -10.6 |
| ZINC000015941768 | -10.6 |
| ZINC000015932172 | -10.6 |
| ZINC000015907294 | -10.6 |
| ZINC000015879939 | -10.6 |
| ZINC000015865434 | -10.5 |
| ZINC000015828592 | -10.5 |
| ZINC000015823781 | -10.5 |
| ZINC000015717339 | -10.5 |
| ZINC000015669386 | -10.5 |
| ZINC000015600989 | -10.5 |
| ZINC000015303564 | -10.5 |
| ZINC000015240826 | -10.5 |
| ZINC000015163181 | -10.5 |
| ZINC000015022237 | -10.5 |
| ZINC000015008996 | -10.5 |
| ZINC000014994095 | -10.5 |
| ZINC000014959227 | -10.5 |
| ZINC000014901184 | -10.5 |
| ZINC000014731152 | -10.5 |
| ZINC000014571975 | -10.5 |
| ZINC000014534788 | -10.5 |
| ZINC000014275678 | -10.5 |
| ZINC000014254207 | -10.5 |
| ZINC000014245352 | -10.5 |
| ZINC000014244835 | -10.5 |
| ZINC000014211486 | -10.5 |
| ZINC000014164140 | -10.5 |
| ZINC000014137181 | -10.5 |
| ZINC000014083597 | -10.5 |
| ZINC000014022216 | -10.5 |
| ZINC000013986713 | -10.5 |
| ZINC000013958182 | -10.5 |
| ZINC000013958156 | -10.5 |
| ZINC000013857986 | -10.5 |
| ZINC000013857985 | -10.5 |
| ZINC000013839242 | -10.5 |
| ZINC000013759648 | -10.5 |
| ZINC000013729662 | -10.5 |
| ZINC000013729659 | -10.5 |
| ZINC000013727747 | -10.5 |
| ZINC000013727744 | -10.5 |
| ZINC000013726197 | -10.5 |
| ZINC000013719830 | -10.5 |
| ZINC000013719824 | -10.5 |
| ZINC000013692735 | -10.5 |

|                  |       |
|------------------|-------|
| ZINC000013691909 | -10.5 |
| ZINC000013683205 | -10.5 |
| ZINC000013674485 | -10.5 |
| ZINC000013632100 | -10.5 |
| ZINC000013607601 | -10.5 |
| ZINC000013596439 | -10.5 |
| ZINC000013593515 | -10.5 |
| ZINC000013592632 | -10.5 |
| ZINC000013592079 | -10.5 |
| ZINC000013591429 | -10.5 |
| ZINC000013590305 | -10.5 |
| ZINC000013581272 | -10.5 |
| ZINC000013576992 | -10.5 |
| ZINC000013572500 | -10.5 |
| ZINC000013564762 | -10.5 |
| ZINC000013561699 | -10.5 |
| ZINC000013561687 | -10.5 |
| ZINC000013226297 | -10.5 |
| ZINC000013164739 | -10.5 |
| ZINC000013164738 | -10.5 |
| ZINC000013164332 | -10.5 |
| ZINC000013153280 | -10.5 |
| ZINC000013149838 | -10.5 |
| ZINC000013145780 | -10.5 |
| ZINC000013137886 | -10.5 |
| ZINC000013127913 | -10.5 |
| ZINC000013117949 | -10.5 |
| ZINC000013114831 | -10.5 |
| ZINC000013114249 | -10.5 |
| ZINC000013114246 | -10.5 |
| ZINC000013102350 | -10.5 |
| ZINC000013097581 | -10.5 |
| ZINC000013083697 | -10.5 |
| ZINC000013083688 | -10.5 |
| ZINC000013038466 | -10.5 |
| ZINC000013037773 | -10.5 |
| ZINC000013013969 | -10.5 |
| ZINC000012982144 | -10.5 |
| ZINC000012961327 | -10.5 |
| ZINC000012897496 | -10.5 |
| ZINC000012897489 | -10.5 |
| ZINC000012891768 | -10.5 |
| ZINC000012890359 | -10.5 |
| ZINC000012871626 | -10.5 |
| ZINC000012857365 | -10.5 |
| ZINC000012823756 | -10.5 |
| ZINC000012813194 | -10.5 |



|                  |       |
|------------------|-------|
| ZINC000012804294 | -10.5 |
| ZINC000012785827 | -10.5 |
| ZINC000012776168 | -10.5 |
| ZINC000012752297 | -10.5 |
| ZINC000012747825 | -10.5 |
| ZINC000012745807 | -10.5 |
| ZINC000012745799 | -10.5 |
| ZINC000012685007 | -10.5 |
| ZINC000012683681 | -10.5 |
| ZINC000012642718 | -10.5 |
| ZINC000012607873 | -10.5 |
| ZINC000012599105 | -10.5 |
| ZINC000012594608 | -10.5 |
| ZINC000012594605 | -10.5 |
| ZINC000012583908 | -10.5 |
| ZINC000012574780 | -10.5 |
| ZINC000012567980 | -10.5 |
| ZINC000012557669 | -10.5 |
| ZINC000012557261 | -10.5 |
| ZINC000012544861 | -10.5 |
| ZINC000012544860 | -10.5 |
| ZINC000012544858 | -10.5 |
| ZINC000012536254 | -10.5 |
| ZINC000012532656 | -10.5 |
| ZINC000012526405 | -10.5 |
| ZINC000012526366 | -10.5 |
| ZINC000012526250 | -10.5 |
| ZINC000012520896 | -10.5 |
| ZINC000012461922 | -10.5 |
| ZINC000012436881 | -10.5 |
| ZINC000012430053 | -10.5 |
| ZINC000012430052 | -10.5 |
| ZINC000012409538 | -10.5 |
| ZINC000012408212 | -10.5 |
| ZINC000012407278 | -10.5 |
| ZINC000012407277 | -10.5 |
| ZINC000012391352 | -10.5 |
| ZINC000012389510 | -10.5 |
| ZINC000012388923 | -10.5 |
| ZINC000012376904 | -10.5 |
| ZINC000012376902 | -10.5 |
| ZINC000012376900 | -10.5 |
| ZINC000012376894 | -10.5 |
| ZINC000012323591 | -10.5 |
| ZINC000012323590 | -10.5 |
| ZINC000012323133 | -10.5 |
| ZINC000012251877 | -10.5 |

|                  |       |
|------------------|-------|
| ZINC000012228789 | -10.5 |
| ZINC000012182319 | -10.5 |
| ZINC000012088417 | -10.5 |
| ZINC000011912528 | -10.5 |
| ZINC000011878812 | -10.5 |
| ZINC000011815339 | -10.5 |
| ZINC000011790311 | -10.5 |
| ZINC000011789777 | -10.5 |
| ZINC000011789776 | -10.5 |
| ZINC000011789775 | -10.5 |
| ZINC000011763154 | -10.5 |
| ZINC000011332919 | -10.5 |
| ZINC000010700178 | -10.5 |
| ZINC000010449360 | -10.5 |
| ZINC000010382819 | -10.5 |
| ZINC000010157804 | -10.5 |
| ZINC000010109618 | -10.5 |
| ZINC000010037176 | -10.5 |
| ZINC000009963759 | -10.5 |
| ZINC000009959172 | -10.5 |
| ZINC000009950085 | -10.5 |
| ZINC000009864846 | -10.5 |
| ZINC000009835253 | -10.5 |
| ZINC000009834930 | -10.5 |
| ZINC000009834907 | -10.5 |
| ZINC000009831075 | -10.5 |
| ZINC000009829894 | -10.5 |
| ZINC000009822568 | -10.5 |
| ZINC000009783674 | -10.5 |
| ZINC000009782698 | -10.5 |
| ZINC000009724002 | -10.5 |
| ZINC000009713023 | -10.5 |
| ZINC000009712106 | -10.5 |
| ZINC000009672357 | -10.5 |
| ZINC000009672328 | -10.5 |
| ZINC000009670441 | -10.5 |
| ZINC000009670254 | -10.5 |
| ZINC000009669171 | -10.5 |
| ZINC000009660633 | -10.5 |
| ZINC000009635313 | -10.5 |
| ZINC000009619177 | -10.5 |
| ZINC000009618955 | -10.5 |
| ZINC000009614093 | -10.5 |
| ZINC000009598560 | -10.5 |
| ZINC000009593274 | -10.5 |
| ZINC000009577758 | -10.5 |
| ZINC000009575326 | -10.5 |

|                  |       |
|------------------|-------|
| ZINC000009548951 | -10.5 |
| ZINC000009532976 | -10.5 |
| ZINC000009532972 | -10.5 |
| ZINC000009532967 | -10.5 |
| ZINC000009515985 | -10.5 |
| ZINC000009512740 | -10.5 |
| ZINC000009508224 | -10.5 |
| ZINC000009506952 | -10.5 |
| ZINC000009499651 | -10.5 |
| ZINC000009499181 | -10.5 |
| ZINC000009498100 | -10.5 |
| ZINC000009496293 | -10.5 |
| ZINC000009494900 | -10.5 |
| ZINC000009494896 | -10.5 |
| ZINC000009494141 | -10.5 |
| ZINC000009492130 | -10.5 |
| ZINC000009491307 | -10.5 |
| ZINC000009491306 | -10.5 |
| ZINC000009478204 | -10.5 |
| ZINC000009469553 | -10.5 |
| ZINC000009464932 | -10.5 |
| ZINC000009463605 | -10.5 |
| ZINC000009454012 | -10.5 |
| ZINC000009434205 | -10.5 |
| ZINC000009433881 | -10.5 |
| ZINC000009429273 | -10.5 |
| ZINC000009412015 | -10.5 |
| ZINC000009412011 | -10.5 |
| ZINC000009409798 | -10.5 |
| ZINC000009382071 | -10.5 |
| ZINC000009358347 | -10.5 |
| ZINC000009354855 | -10.5 |
| ZINC000009338104 | -10.5 |
| ZINC000009336848 | -10.5 |
| ZINC000009331323 | -10.5 |
| ZINC000009329918 | -10.5 |
| ZINC000009320110 | -10.5 |
| ZINC000009319587 | -10.5 |
| ZINC000009319034 | -10.5 |
| ZINC000009318260 | -10.5 |
| ZINC000009317664 | -10.5 |
| ZINC000009274010 | -10.5 |
| ZINC000009266825 | -10.5 |
| ZINC000009240793 | -10.5 |
| ZINC000009235680 | -10.5 |
| ZINC000009234386 | -10.5 |
| ZINC000009223869 | -10.5 |

|                  |       |
|------------------|-------|
| ZINC000009209960 | -10.5 |
| ZINC000009206706 | -10.5 |
| ZINC000009192037 | -10.5 |
| ZINC000009190652 | -10.5 |
| ZINC000009171464 | -10.5 |
| ZINC000009170399 | -10.5 |
| ZINC000009167189 | -10.5 |
| ZINC000009144939 | -10.5 |
| ZINC000009136047 | -10.5 |
| ZINC000009126736 | -10.5 |
| ZINC000009116570 | -10.5 |
| ZINC000009114541 | -10.5 |
| ZINC000009113631 | -10.5 |
| ZINC000009111314 | -10.5 |
| ZINC000009088227 | -10.5 |
| ZINC000009087130 | -10.5 |
| ZINC000009086829 | -10.5 |
| ZINC000009053675 | -10.5 |
| ZINC000009012199 | -10.5 |
| ZINC000008995590 | -10.5 |
| ZINC000008994261 | -10.5 |
| ZINC000008990976 | -10.5 |
| ZINC000008979804 | -10.5 |
| ZINC000008974497 | -10.5 |
| ZINC000008974476 | -10.5 |
| ZINC000008966194 | -10.5 |
| ZINC000008965513 | -10.5 |
| ZINC000008964742 | -10.5 |
| ZINC000008955515 | -10.5 |
| ZINC000008955514 | -10.5 |
| ZINC000008934243 | -10.5 |
| ZINC000008931817 | -10.5 |
| ZINC000008926046 | -10.5 |
| ZINC000008924522 | -10.5 |
| ZINC000008892077 | -10.5 |
| ZINC000008870467 | -10.5 |
| ZINC000008856956 | -10.5 |
| ZINC000008856954 | -10.5 |
| ZINC000008850473 | -10.5 |
| ZINC000008775396 | -10.5 |
| ZINC000008775393 | -10.5 |
| ZINC000008773610 | -10.5 |
| ZINC000008764995 | -10.5 |
| ZINC000008764994 | -10.5 |
| ZINC000008763564 | -10.5 |
| ZINC000008751085 | -10.5 |
| ZINC000008745390 | -10.5 |

|                  |       |
|------------------|-------|
| ZINC000008734387 | -10.5 |
| ZINC000008695434 | -10.5 |
| ZINC000008682621 | -10.5 |
| ZINC000008661062 | -10.5 |
| ZINC000008589187 | -10.5 |
| ZINC000008589184 | -10.5 |
| ZINC000008441959 | -10.5 |
| ZINC000008300441 | -10.5 |
| ZINC000008300432 | -10.5 |
| ZINC000008297473 | -10.5 |
| ZINC000006498686 | -10.5 |
| ZINC000006408849 | -10.5 |
| ZINC000006161938 | -10.5 |
| ZINC000006161895 | -10.5 |
| ZINC000006161883 | -10.5 |
| ZINC000006161868 | -10.5 |
| ZINC000005956729 | -10.5 |
| ZINC000005295032 | -10.5 |
| ZINC000004100333 | -10.5 |
| ZINC000004057572 | -10.5 |
| ZINC000003558286 | -10.5 |
| ZINC000003558152 | -10.5 |
| ZINC000003557191 | -10.5 |
| ZINC000003536610 | -10.5 |
| ZINC000003536609 | -10.5 |
| ZINC000003536347 | -10.5 |
| ZINC000003452235 | -10.5 |
| ZINC000003436896 | -10.5 |
| ZINC000003408397 | -10.5 |
| ZINC000003406781 | -10.5 |
| ZINC000003370640 | -10.5 |
| ZINC000003363386 | -10.5 |
| ZINC000003354646 | -10.5 |
| ZINC000003337861 | -10.5 |
| ZINC000003334259 | -10.5 |
| ZINC000003334257 | -10.5 |
| ZINC000003334074 | -10.5 |
| ZINC000003306136 | -10.5 |
| ZINC000003291496 | -10.5 |
| ZINC000003242549 | -10.5 |
| ZINC000003104953 | -10.5 |
| ZINC000002997539 | -10.5 |
| ZINC000002649195 | -10.5 |
| ZINC000002644727 | -10.5 |
| ZINC000002485548 | -10.5 |
| ZINC000002467559 | -10.5 |
| ZINC000002453250 | -10.5 |

|                  |       |
|------------------|-------|
| ZINC000002447226 | -10.5 |
| ZINC000002443424 | -10.5 |
| ZINC000002422434 | -10.5 |
| ZINC000002411828 | -10.5 |
| ZINC000002409557 | -10.5 |
| ZINC000002353465 | -10.5 |
| ZINC000002350925 | -10.5 |
| ZINC000002327531 | -10.5 |
| ZINC000002295345 | -10.5 |
| ZINC000002227074 | -10.5 |
| ZINC000002212698 | -10.5 |
| ZINC000002196878 | -10.5 |
| ZINC000002170981 | -10.5 |
| ZINC000002153278 | -10.5 |
| ZINC000002104795 | -10.5 |
| ZINC000002102622 | -10.5 |
| ZINC000001806022 | -10.5 |
| ZINC000001399524 | -10.5 |
| ZINC000001372082 | -10.5 |
| ZINC000001372081 | -10.5 |
| ZINC000001372062 | -10.5 |
| ZINC000001372061 | -10.5 |
| ZINC000001352198 | -10.5 |
| ZINC000001324632 | -10.5 |
| ZINC000001324626 | -10.5 |
| ZINC000001320955 | -10.5 |
| ZINC000001248243 | -10.5 |
| ZINC000001222978 | -10.5 |
| ZINC000001165515 | -10.5 |
| ZINC000001129468 | -10.5 |
| ZINC000001084238 | -10.5 |
| ZINC000000930477 | -10.5 |
| ZINC000000928375 | -10.5 |
| ZINC000000907722 | -10.5 |
| ZINC000000907690 | -10.5 |
| ZINC000000711163 | -10.5 |

---
